# Supplementary material for: Mesoscale variations in the assemblage structure and trophodynamics of mesozooplankton communities of the Adriatic basin (Mediterranean Sea)
Source: Copernicus journal article supplement (doi:10.5194/bg-2021-240), 2021-10-01
Supplement: Supplementary file 2 [file bg-2021-240-supplement.pdf]

**Table S1.** List and abundance (N/m<sup>3</sup>) of the taxa collected in the different hauls from the three sub-areas of the Adriatic basin surveyed in June-July 2019 during MEDIAS 2019 survey.

| Taxon                         | GSA 17 N |         |         |        |         |        | GSA 17 C-S |        |        |        |       |        | GSA 18 |        |        |        |
|-------------------------------|----------|---------|---------|--------|---------|--------|------------|--------|--------|--------|-------|--------|--------|--------|--------|--------|
|                               | 4_17     | 14_17   | 17_17   | 22_17  | 23_17   | 30_17  | 33_17      | 38_17  | 43_17  | 48_17  | 54_17 | 64_17  | 5_18   | 11_18  | 48_18  | 57_18  |
| <i>Phylum</i> CNIDARIA        |          |         |         |        |         |        |            |        |        |        |       |        |        |        |        |        |
| <i>Class</i> HYDROZOA         |          |         |         |        |         |        |            |        |        |        |       |        |        |        |        |        |
| <i>Order</i> SIPHONOPHORAE    |          |         |         |        |         |        |            |        |        |        |       |        |        |        |        |        |
| <i>Suborder</i> CALYCOPHORAE  | -        | -       | -       | -      | 5.65    | 30.58  | 13.75      | -      | -      | -      | 0.06  | 3.03   | 2.23   | -      | 11.03  | 0.08   |
| <i>Phylum</i> ARTHROPODA      |          |         |         |        |         |        |            |        |        |        |       |        |        |        |        |        |
| <i>Subphylum</i> CRUSTACEA    |          |         |         |        |         |        |            |        |        |        |       |        |        |        |        |        |
| <i>Superorder</i> CLADOCERA   |          |         |         |        |         |        |            |        |        |        |       |        |        |        |        |        |
| <i>Evadne spinifera</i>       | 103.29   | 34.89   | 42.63   | -      | 55.36   | 179.81 | -          | -      | -      | 46.77  | 0.79  | -      | -      | -      | -      | -      |
| <i>Penilia avirostris</i>     | -        | 8.72    | 28.42   | -      | 18.45   | 58.85  | 97.92      | 298.43 | -      | 98.46  | -     | 1.13   | 5.66   | 26.84  | 5.62   | -      |
| <i>Podon sp.</i>              | 258.23   | 100.30  | 355.24  | 58.61  | 129.18  | 42.50  | 116.29     | 361.93 | 11.42  | 39.38  | -     | 1.13   | 3.40   | 34.87  | 22.48  | -      |
| <i>Pseudevadne tergestina</i> | -        | -       | -       | -      | 156.86  | -      | -          | -      | -      | 12.31  | -     | -      | -      | -      | 1.12   | -      |
| <i>Subclass</i> COPEPODA      |          |         |         |        |         |        |            |        |        |        |       |        |        |        |        |        |
| <i>Order</i> CALANOIDA        |          |         |         |        |         |        |            |        |        |        |       |        |        |        |        |        |
| <i>Acartia sp.</i>            | 7850.14  | 1330.07 | 5438.43 | -      | 4422.10 | 264.81 | 336.62     | 12.90  | 8.33   | 595.67 | 3.93  | 15.89  | -      | 0.61   | 1.12   | 0.72   |
| <i>Aetideidae</i>             | -        | -       | -       | -      | -       | -      | -          | -      | -      | -      | -     | -      | -      | 0.45   | -      | -      |
| <i>Aetideus giesbrechti</i>   | -        | -       | -       | -      | -       | -      | -          | -      | -      | -      | -     | -      | -      | -      | -      | 0.72   |
| <i>Bradyidius armatus</i>     | -        | -       | -       | -      | -       | -      | -          | -      | -      | -      | -     | 0.15   | -      | -      | -      | 0.16   |
| <i>Calanoida</i>              | 2504.82  | 968.12  | 2557.75 | 898.73 | 1891.54 | 369.42 | 1273.02    | 673.06 | 261.05 | 246.15 | 49.53 | -      | 260.33 | 905.99 | 183.24 | 150.50 |
| <i>Calanoidea</i>             | -        | -       | -       | -      | -       | 6.21   | 7.47       | 1.64   | 1.99   | 10.10  | 97.25 | 100.62 | 1.99   | -      | 10.78  | 0.65   |
| <i>Calanus helgolandicus</i>  | -        | -       | 1.72    | -      | 3.30    | 9.90   | 127.65     | -      | 4.37   | 1.38   | 6.21  | 7.29   | 2.49   | 2.42   | 0.25   | 2.75   |
| <i>Calanus sp.</i>            | -        | -       | -       | -      | -       | -      | -          | -      | -      | -      | -     | -      | -      | -      | -      | 0.24   |
| <i>Calocalanus pavo</i>       | -        | -       | -       | -      | -       | -      | 0.30       | -      | -      | -      | -     | -      | 0.20   | -      | -      | -      |
| <i>Calocalanus sp.</i>        | -        | -       | -       | -      | -       | -      | -          | -      | -      | -      | -     | -      | -      | -      | 0.38   | -      |
| <i>Candacia armata</i>        | -        | -       | -       | -      | -       | -      | 1.20       | 3.27   | -      | -      | -     | -      | -      | 0.30   | 1.50   | 0.08   |
| <i>Candacia bispinosa</i>     | -        | -       | -       | -      | -       | -      | -          | -      | -      | -      | -     | -      | 0.20   | -      | -      | -      |
| <i>Candacia longimana</i>     | -        | -       | -       | -      | -       | 0.15   | -          | -      | -      | -      | -     | -      | -      | -      | -      | -      |
| <i>Candacia simplex</i>       | -        | -       | -       | -      | -       | -      | -          | -      | -      | -      | -     | -      | 0.10   | -      | -      | -      |

|                                   |         |        |         |   |         |         |        |         |       |        |       |        |       |       |        |       |
|-----------------------------------|---------|--------|---------|---|---------|---------|--------|---------|-------|--------|-------|--------|-------|-------|--------|-------|
| <i>Centropages kroyeri</i>        | -       | -      | -       | - | -       | -       | -      | 0.55    | -     | -      | -     | -      | -     | 0.15  | -      | -     |
| <i>Centropages ponticus</i>       | -       | -      | -       | - | -       | -       | -      | 1.09    | -     | -      | -     | -      | -     | -     | -      | -     |
| <i>Centropages typicus</i>        | 515.79  | 79.86  | 67.13   | - | 20.72   | 28.31   | 86.96  | 9.82    | 3.60  | 39.19  | 0.12  | 0.15   | 0.50  | 10.72 | 9.53   | -     |
| <i>Eucheta sp.</i>                | -       | -      | -       | - | -       | 0.30    | 38.25  | 0.55    | 22.38 | 3.67   | 23.98 | 13.45  | 12.13 | 0.91  | 5.89   | 19.24 |
| <i>Gaetanus tenuispinus</i>       | -       | -      | -       | - | -       | 0.15    | -      | -       | -     | 116.16 | -     | -      | -     | -     | -      | -     |
| <i>Haloptilus longicornis</i>     | -       | -      | -       | - | -       | -       | -      | -       | -     | -      | 0.06  | -      | -     | -     | 0.25   | -     |
| <i>Isias clavipes</i>             | -       | -      | -       | - | -       | -       | -      | 0.55    | -     | 2.30   | -     | -      | -     | 8.05  | -      | -     |
| <i>Lucicutia flavicornis</i>      | -       | -      | 0.86    | - | -       | 0.15    | 0.30   | -       | -     | -      | -     | -      | 4.45  | -     | -      | 1.05  |
| <i>Mecynocera clausi</i>          | -       | -      | -       | - | -       | 0.15    | 12.24  | -       | 1.69  | -      | -     | 1.13   | -     | -     | -      | -     |
| <i>Nannocalanus minor</i>         | -       | -      | -       | - | -       | 0.15    | 7.47   | -       | -     | -      | 0.55  | 0.46   | 3.58  | -     | 0.88   | 3.96  |
| <i>Pareucalanus attenuatus</i>    | -       | -      | -       | - | -       | -       | -      | -       | 0.06  | -      | 0.06  | -      | 1.39  | -     | -      | 0.41  |
| <i>Pleuromamma abdominalis</i>    | -       | -      | -       | - | -       | -       | -      | -       | -     | 4.13   | -     | -      | -     | -     | -      | 1.70  |
| <i>Pleuromamma gracilis</i>       | -       | -      | -       | - | -       | -       | -      | -       | -     | -      | -     | 0.26   | -     | -     | -      | -     |
| <i>Pleuromamma sp.</i>            | -       | -      | -       | - | -       | -       | -      | -       | -     | -      | -     | -      | -     | -     | 0.13   | -     |
| <i>Pontella lobiancoi</i>         | -       | -      | -       | - | -       | -       | -      | -       | -     | 0.46   | -     | -      | -     | 0.15  | -      | -     |
| <i>Pontella mediterranea</i>      | -       | -      | -       | - | 0.16    | -       | -      | -       | -     | -      | -     | -      | -     | -     | -      | -     |
| <i>Rhincalanus sp.</i>            | -       | -      | -       | - | -       | -       | -      | -       | -     | 10.43  | -     | -      | -     | -     | -      | -     |
| <i>Scolecithryx bradyi</i>        | -       | -      | -       | - | -       | -       | -      | -       | -     | -      | -     | -      | 0.10  | -     | -      | 0.96  |
| <i>Temora longicornis</i>         | -       | 0.33   | 15.07   | - | 18.45   | 13.08   | -      | -       | -     | 1.84   | 0.79  | -      | -     | -     | -      | -     |
| <i>Temora stylifera</i>           | -       | -      | -       | - | -       | 0.44    | 58.55  | -       | -     | 19.62  | -     | -      | 0.20  | -     | 20.53  | 0.72  |
| <b>Order CYCLOPOIDA</b>           |         |        |         |   |         |         |        |         |       |        |       |        |       |       |        |       |
| <i>Copilia sp.</i>                | -       | -      | -       | - | -       | -       | 0.30   | -       | -     | -      | -     | -      | -     | -     | -      | -     |
| <i>Copilia mediterranea</i>       | -       | -      | -       | - | -       | -       | -      | -       | 1.80  | -      | -     | 0.05   | 0.20  | -     | -      | -     |
| <i>Corycaeus sp.</i>              | -       | -      | -       | - | -       | -       | 116.88 | -       | 3.26  | 0.46   | 1.57  | -      | 12.71 | 4.38  | 8.63   | 1.85  |
| <i>Oithona sp.</i>                | 2685.58 | 444.81 | 1122.57 | - | 1716.23 | 1013.47 | 697.71 | 1498.50 | 53.84 | 211.68 | 95.13 | 190.63 | 10.98 | 10.00 | 15.74  | 42.49 |
| <i>Oncaea sp.</i>                 | -       | 4.36   | 56.84   | - | 18.45   | 29.42   | 244.81 | 25.94   | 65.26 | 12.31  | 8.65  | 30.64  | 26.23 | 43.13 | 114.67 | 8.64  |
| <i>Sapphirina ovatolanceolata</i> | -       | -      | -       | - | -       | -       | -      | -       | 0.06  | -      | -     | -      | -     | -     | -      | -     |
| <b>Order HARPACTICOIDA</b>        |         |        |         |   |         |         |        |         |       |        |       |        |       |       |        |       |
| <i>Clytemnestra scutellata</i>    | -       | -      | -       | - | -       | -       | -      | -       | 1.63  | -      | -     | 2.27   | -     | -     | 0.63   | 0.72  |
| <i>Euterpina acutifrons</i>       | 51.65   | 8.72   | 42.63   | - | 18.45   | 13.08   | 12.24  | -       | -     | 2.46   | -     | -      | -     | -     | 1.12   | -     |
| Harpacticoida                     | -       | -      | -       | - | -       | 0.15    | -      | 1.09    | -     | -      | -     | -      | -     | -     | -      | -     |
| <i>Microsetella sp.</i>           | -       | -      | -       | - | -       | -       | -      | -       | -     | -      | 1.57  | 3.40   | -     | -     | 1.12   | 5.04  |
| <b>Order MONSTRILLOIDA</b>        |         |        |         |   |         |         |        |         |       |        |       |        |       |       |        |       |

|                                 |       |      |      |   |      |      |       |      |      |       |      |      |      |      |      |      |      |   |
|---------------------------------|-------|------|------|---|------|------|-------|------|------|-------|------|------|------|------|------|------|------|---|
| <i>Monstrilla sp.</i>           | -     | -    | -    | - | -    | -    | -     | -    | -    | -     | -    | -    | -    | -    | -    | -    | 0.13 | - |
| Class MALACOSTRACA              |       |      |      |   |      |      |       |      |      |       |      |      |      |      |      |      |      |   |
| Order AMPHIPODA                 |       |      |      |   |      |      |       |      |      |       |      |      |      |      |      |      |      |   |
| <i>Eupronoe minuta</i>          | -     | -    | -    | - | -    | -    | -     | -    | -    | -     | 0.06 | -    | -    | -    | -    | -    | -    | - |
| <i>Hyperia sp.</i>              | -     | -    | -    | - | -    | -    | -     | -    | -    | -     | -    | -    | 0.50 | -    | -    | -    | -    | - |
| <i>Lestrignus schizogeneios</i> | -     | -    | -    | - | -    | -    | -     | -    | 0.28 | -     | 1.22 | 0.56 | 0.20 | -    | -    | 0.13 | 0.65 | - |
| <i>Lycaea pulex</i>             | -     | -    | -    | - | -    | -    | -     | -    | -    | -     | -    | -    | 0.10 | -    | -    | -    | -    | - |
| <i>Phronima atlantica</i>       | -     | -    | -    | - | -    | -    | -     | -    | 0.06 | -     | 0.06 | -    | -    | -    | -    | 0.13 | -    | - |
| <i>Phronima sedentaria</i>      | -     | -    | -    | - | -    | -    | -     | -    | -    | -     | -    | -    | 0.10 | -    | -    | -    | -    | - |
| <i>Phrosina semilunata</i>      | -     | -    | -    | - | -    | -    | -     | -    | -    | -     | 0.06 | -    | -    | -    | -    | -    | -    | - |
| <i>Phtisica marina</i>          | -     | -    | -    | - | -    | -    | -     | 0.55 | -    | -     | -    | -    | -    | -    | -    | -    | -    | - |
| <i>Primno macropa</i>           | -     | -    | -    | - | -    | -    | -     | -    | -    | -     | -    | -    | 0.10 | -    | -    | -    | -    | - |
| <i>Pseudolirius kroyeri</i>     | -     | -    | -    | - | -    | -    | -     | 0.60 | -    | -     | 0.92 | -    | -    | -    | -    | -    | -    | - |
| <i>Themisto abyssorum</i>       | -     | -    | -    | - | -    | -    | -     | -    | -    | -     | -    | 0.05 | -    | -    | -    | -    | -    | - |
| Order DECAPODA (zoea)           |       |      |      |   |      |      |       |      |      |       |      |      |      |      |      |      |      |   |
| Alpheidae                       | -     | -    | -    | - | -    | 0.15 | -     | -    | -    | -     | -    | 0.05 | -    | -    | -    | -    | -    | - |
| Axiidea                         | -     | -    | -    | - | -    | -    | 17.34 | -    | 0.79 | -     | -    | -    | -    | -    | -    | 0.75 | -    | - |
| Brachyura                       | 58.95 | 0.33 | -    | - | 2.04 | 0.30 | 4.78  | 4.36 | 0.28 | 19.91 | 0.18 | 0.87 | 1.63 | 3.64 | 0.13 | 7.45 | -    | - |
| Caridea                         | -     | -    | -    | - | -    | -    | -     | -    | -    | -     | -    | -    | -    | 3.48 | -    | -    | -    | - |
| Crangonidae                     | -     | -    | -    | - | -    | 1.18 | -     | 1.64 | 0.34 | -     | 0.06 | 0.05 | -    | 0.30 | -    | 0.16 | -    | - |
| <i>Diogenes pugilator</i>       | 2.11  | -    | -    | - | -    | -    | -     | -    | -    | -     | -    | -    | -    | -    | -    | -    | -    | - |
| Galatheidae                     | -     | -    | -    | - | -    | -    | -     | -    | 0.23 | -     | -    | -    | -    | -    | -    | -    | -    | - |
| Hippolytidae                    | 12.63 | 5.01 | 3.01 | - | 0.63 | -    | -     | -    | -    | -     | 0.06 | -    | -    | -    | -    | -    | -    | - |
| <i>Jaxea nocturna</i>           | -     | -    | -    | - | -    | -    | -     | 0.55 | -    | -     | -    | -    | -    | 0.15 | -    | -    | -    | - |
| Paguroidea                      | 21.05 | -    | -    | - | 0.16 | 0.44 | -     | -    | -    | -     | -    | -    | 0.20 | 0.61 | 2.88 | -    | -    | - |
| Palaemonidae                    | -     | -    | 1.29 | - | 0.16 | -    | -     | 2.18 | 0.06 | -     | 4.20 | 0.05 | 0.10 | 0.45 | -    | -    | -    | - |
| Pandalidae                      | -     | -    | -    | - | 0.16 | -    | -     | 4.36 | -    | -     | -    | 0.21 | 0.20 | -    | 0.25 | -    | -    | - |
| Penaeidae                       | -     | -    | -    | - | -    | 0.15 | 1.20  | -    | -    | 0.46  | -    | 0.67 | -    | 3.64 | -    | -    | -    | - |
| Porcellanidae                   | 16.84 | 0.33 | -    | - | -    | -    | -     | -    | -    | -     | -    | -    | -    | -    | -    | -    | -    | - |
| Processidae                     | 40.00 | 1.34 | -    | - | 1.41 | 0.15 | 5.68  | -    | 0.06 | -     | -    | 0.10 | 0.20 | -    | -    | -    | -    | - |
| Stenopodidea                    | -     | -    | 6.02 | - | 0.16 | 0.89 | -     | -    | -    | -     | -    | -    | -    | -    | -    | -    | -    | - |
| <i>Upogebia sp.</i>             | -     | -    | -    | - | -    | -    | -     | -    | -    | 10.56 | -    | -    | -    | -    | -    | -    | -    | - |
| Order DECAPODA (megalopa)       |       |      |      |   |      |      |       |      |      |       |      |      |      |      |      |      |      |   |

|                                  |         |       |       |   |       |       |       |       |       |      |       |       |       |      |       |      |      |
|----------------------------------|---------|-------|-------|---|-------|-------|-------|-------|-------|------|-------|-------|-------|------|-------|------|------|
| Brachyura                        | -       | -     | -     | - | -     | -     | -     | -     | -     | 0.06 | 0.46  | -     | 0.05  | -    | 0.15  | -    | -    |
| <i>Order</i> EUPHAUSIACEA        |         |       |       |   |       |       |       |       |       |      |       |       |       |      |       |      |      |
| Euphausiacea                     | -       | -     | -     | - | -     | -     | -     | -     | -     | -    | -     | -     | -     | -    | 0.40  | -    | -    |
| <i>Meganyctiphanes norvegica</i> | -       | -     | -     | - | -     | -     | -     | -     | -     | 0.62 | 1.38  | 0.12  | 5.44  | 0.10 | -     | -    | -    |
| <i>Nyctiphanes couchii</i>       | -       | -     | -     | - | -     | -     | -     | -     | -     | -    | -     | -     | -     | -    | -     | -    | 0.24 |
| <i>Stylocheiron suhmi</i>        | -       | -     | -     | - | -     | -     | -     | -     | -     | -    | -     | -     | -     | -    | -     | -    | 0.24 |
| <i>Order</i> ISOPODA             | -       | -     | 0.43  | - | -     | -     | -     | -     | -     | -    | 0.46  | 0.06  | 0.05  | 0.10 | 0.15  | -    | 0.72 |
| <i>Order</i> MYSIDA              |         |       |       |   |       |       |       |       |       |      |       |       |       |      |       |      |      |
| <i>Anchialina agilis</i>         | -       | -     | 0.43  | - | -     | -     | -     | -     | -     | -    | -     | -     | -     | 0.10 | -     | -    | -    |
| <i>Erythrops sp.</i>             | -       | -     | -     | - | -     | -     | -     | -     | -     | -    | -     | -     | -     | -    | 1.36  | -    | -    |
| <i>Eucopia unguiculata</i>       | -       | -     | 0.43  | - | -     | -     | -     | -     | -     | -    | -     | -     | -     | -    | -     | -    | -    |
| <i>Haplostylus normani</i>       | -       | -     | -     | - | -     | -     | -     | -     | -     | 0.06 | 0.46  | -     | -     | -    | -     | -    | -    |
| <i>Leptomysis gracilis</i>       | -       | -     | -     | - | -     | -     | -     | -     | -     | 0.11 | -     | -     | -     | -    | 4.39  | -    | -    |
| <i>Leptomysis mediterranea</i>   | -       | -     | 1.29  | - | -     | -     | -     | -     | -     | -    | -     | -     | -     | -    | -     | -    | -    |
| <i>Leptomysis sp.</i>            | -       | -     | -     | - | -     | -     | -     | -     | 0.55  | -    | -     | -     | -     | -    | -     | -    | -    |
| <i>Siriella sp.</i>              | -       | -     | -     | - | -     | -     | -     | -     | -     | -    | -     | -     | 0.10  | -    | -     | -    | 0.08 |
| <i>Order</i> STOMATOPODA (larva) | -       | -     | -     | - | -     | -     | -     | -     | -     | -    | -     | -     | 0.05  | -    | 0.15  | 0.13 | -    |
| <i>Class</i> OSTRACODA           | -       | -     | -     | - | -     | -     | 3.48  | -     | 3.26  | -    | 0.79  | 1.13  | 3.18  | -    | -     | -    | 1.37 |
| <i>Phylum</i> MOLLUSCA           |         |       |       |   |       |       |       |       |       |      |       |       |       |      |       |      |      |
| <i>Class</i> BIVALVIA (larva)    | 77.47   | 43.61 | 14.21 | - | 36.91 | 29.42 | 42.84 | 69.85 | 57.11 | 9.85 | 12.58 | 30.64 | -     | -    | 12.37 | -    | -    |
| <i>Class</i> GASTEROPODA         |         |       |       |   |       |       |       |       |       |      |       |       |       |      |       |      |      |
| <i>Atlanta sp.</i>               | -       | -     | -     | - | -     | -     | -     | -     | -     | 0.46 | -     | 0.05  | -     | -    | -     | -    | -    |
| <i>Cavolinia inflexa</i>         | -       | -     | -     | - | -     | -     | -     | -     | -     | -    | -     | -     | -     | -    | 0.13  | 0.24 | -    |
| <i>Creseis acicula</i>           | -       | -     | -     | - | -     | 0.15  | 4.48  | -     | 24.20 | 1.38 | -     | 0.46  | 1.59  | -    | 44.55 | 3.60 | -    |
| Gasteropoda (larva)              | 1549.37 | 74.14 | 42.63 | - | -     | 22.88 | 24.48 | 95.24 | -     | 4.92 | 4.72  | 5.67  | -     | -    | 20.24 | -    | -    |
| <i>Heliconoides inflatus</i>     | -       | -     | -     | - | -     | -     | -     | -     | 0.06  | -    | -     | -     | -     | -    | -     | -    | -    |
| <i>Phylum</i> POLYCHAETA         |         |       |       |   |       |       |       |       |       |      |       |       |       |      |       |      |      |
| Alciopini                        | -       | -     | -     | - | -     | -     | -     | -     | -     | -    | -     | -     | 0.099 | -    | -     | -    | -    |
| <i>Exogone sp.</i>               | -       | -     | -     | - | -     | -     | -     | -     | -     | 1.84 | -     | -     | -     | -    | -     | -    | -    |
| Opheliidae                       | -       | -     | -     | - | -     | -     | -     | -     | -     | -    | -     | -     | 0.099 | -    | -     | -    | -    |
| <i>Poecilochaetus serpens</i>    | 6.32    | 0.67  | 0.43  | - | 0.31  | -     | 1.20  | -     | -     | -    | -     | 0.15  | -     | -    | -     | -    | -    |
| Polychaeta                       | -       | -     | -     | - | -     | -     | -     | 0.55  | 0.06  | 0.46 | -     | -     | -     | 0.15 | -     | -    | -    |
| <i>Pontodora pelagica</i>        | -       | -     | -     | - | -     | -     | 0.30  | -     | -     | 0.46 | -     | -     | -     | -    | -     | -    | -    |

|                             |       |      |      |   |      |      |       |      |      |      |      |       |       |       |       |       |      |
|-----------------------------|-------|------|------|---|------|------|-------|------|------|------|------|-------|-------|-------|-------|-------|------|
| <i>Vanadis sp.</i>          | -     | -    | -    | - | -    | -    | -     | -    | -    | -    | -    | -     | -     | -     | -     | -     | 0.08 |
| <i>Phylum</i> CHAETOGNATHA  | -     | -    | -    | - | 3.45 | 2.51 | 26.91 | -    | 7.10 | 0.46 | 1.16 | 6.11  | 30.36 | 28.03 | 17.30 | 10.85 |      |
| <i>Phylum</i> CHORDATA      |       |      |      |   |      |      |       |      |      |      |      |       |       |       |       |       |      |
| <i>Subphylum</i> TUNICATA   |       |      |      |   |      |      |       |      |      |      |      |       |       |       |       |       |      |
| <i>Class</i> APPENDICULARIA | -     | -    | -    | - | -    | -    | 36.72 | -    | 9.79 | -    | -    | 15.89 | 0.50  | 60.09 | -     | 1.85  |      |
| <i>Class</i> THALIACEA      | -     | -    | -    | - | -    | 0.44 | 1.49  | -    | 5.42 | -    | 1.58 | 5.09  | -     | 5.45  | 1.38  | 6.08  |      |
| <i>Subphylum</i> VERTEBRATA |       |      |      |   |      |      |       |      |      |      |      |       |       |       |       |       |      |
| Fish larvae                 | 2.11  | -    | -    | - | -    | 1.03 | -     | -    | 1.19 | 2.30 | 0.12 | 0.21  | 0.20  | 0.91  | -     | 0.57  |      |
| Anchovy eggs                | 10.53 | -    | 1.29 | - | 4.24 | 6.54 | 8.97  | -    | -    | 1.38 | 0.55 | 4.54  | -     | -     | 0.25  | -     |      |
| Fish eggs                   | 14.74 | 1.00 | 2.15 | - | -    | 3.27 | 10.31 | 1.09 | 1.08 | 1.84 | -    | -     | -     | -     | 0.75  | 0.08  |      |
